# Supplementary material for: Effect of Hybrid Fiber Reinforcements on the Mechanical and Ductility Performance of HPC Incorporating Micro Silica and Alccofine-1203 Prabath, N V N a , and Ramadoss, P b
Source: Research Square preprint supplement (doi:10.21203/rs.3.rs-1872706/v1), 2022-07-26
Supplement: Supplementary file 1 [file 1b4dc980736b838252a134d9.pdf]

# Effect of Hybrid Fiber Reinforcements on the Mechanical and Ductility Performance of HPC Incorporating Micro Silica and Alccofine-1203

**Prabath, N V N<sup>a</sup>, and Ramadoss, P<sup>b</sup>**

<sup>a</sup> Research Scholar, Dept. of Civil Engineering, Puducherry Technological University, Puducherry 605014, India (E-mail: [prabathnvn5@pec.edu](mailto:prabathnvn5@pec.edu))

<sup>b</sup> Professor, Dept. of Civil Engineering, Puducherry Technological University, Puducherry 605014, India (E-mail: [dosspr@ptuniv.edu.in](mailto:dosspr@ptuniv.edu.in))

**Table 1:** Physical properties of steel and polypropylene fibers

| <b>Fiber</b>        | <b>Length (mm)</b> | <b>Diameter (mm)</b> | <b>Aspect ratio</b> | <b>Ultimate tensile strength (MPa)</b> | <b>Modulus of elasticity (GPa)</b> | <b>Density (Kg/m<sup>3</sup>)</b> |
|---------------------|--------------------|----------------------|---------------------|----------------------------------------|------------------------------------|-----------------------------------|
| Steel fiber         | 36                 | 0.45                 | 80                  | 910                                    | 200                                | 7850                              |
| Polypropylene Fiber | 12                 | 0.02                 | 600                 | 400                                    | 69                                 | 910                               |

**Table 2:** Mix proportioning of HPC/ HPFRC/ HP-HyFRC

| <b>Mix Design</b> | <b>Cement</b> | <b>Silica fume replacement</b> | <b>w/b ratio</b> | <b>F.A</b> | <b>C.A</b> | <b>Super plasticizer (%)</b> | <b>Fiber content (<math>V_f</math>), (%)</b> |                      |
|-------------------|---------------|--------------------------------|------------------|------------|------------|------------------------------|----------------------------------------------|----------------------|
|                   |               |                                |                  |            |            |                              | <b>Steel</b>                                 | <b>Polypropylene</b> |
| HPFRC-0           | 1             | 0.15 (15%) & 0.2 (20%)         | 0.38             | 1.34       | 2.53       | 1.75                         | 0, 0.5, 1 & 1.5                              | 0, 0.25, 0.5 & 1     |
| HPFRC*-0          | 1             | 0.2                            | 0.28             | 1.34       | 2.53       | 2.75                         | 0, 0.5, 1 & 1.5                              | 0, 0.25, 0.5 & 1     |

**Table 3:** 28-Day Compressive strengths and flexural strengths of HPFRC/ HP-HyFRC, and improvement in strength

| Mix Designation       | w/b ratio | Compressive strength, $f_{cf}$ (MPa) | Improvement in strength (%) | Flexural strength, $f_{rf}$ (MPa) | Improvement in strength (%) |
|-----------------------|-----------|--------------------------------------|-----------------------------|-----------------------------------|-----------------------------|
| HPFRC-0               | 0.38      | 75.05                                | 0.00                        | 8.12                              | 0.00                        |
| HPFRC-S0.5            | 0.38      | 78.85                                | 5.06                        | 9.14                              | 12.56                       |
| HPFRC-S1              | 0.38      | 82.50                                | 9.93                        | 9.80                              | 20.68                       |
| HPFRC-S1.5            | 0.38      | 86.15                                | 14.79                       | 10.85                             | 33.46                       |
| HPFRC-P0.25           | 0.38      | 75.95                                | 1.20                        | 8.54                              | 5.18                        |
| HPFRC-P0.5            | 0.38      | 77.65                                | 3.46                        | 8.64                              | 6.40                        |
| HPFRC-P1              | 0.38      | 78.40                                | 4.40                        | 8.87                              | 9.24                        |
| HP-HyFRC(S0.5,P0.25)  | 0.38      | 79.55                                | 5.95                        | 9.25                              | 13.92                       |
| HP-HyFRC(S0.5,P0.5)   | 0.38      | 79.68                                | 6.17                        | 9.38                              | 15.52                       |
| HP-HyFRC(S0.5,P1)     | 0.38      | 82.54                                | 9.98                        | 9.69                              | 19.33                       |
| HP-HyFRC(S1,P0.25)    | 0.38      | 83.75                                | 11.59                       | 10.23                             | 25.98                       |
| HP-HyFRC(S1,P0.5)     | 0.38      | 85.50                                | 13.92                       | 10.96                             | 34.98                       |
| HP-HyFRC(S1,P1)       | 0.38      | 86.45                                | 15.18                       | 11.29                             | 39.03                       |
| HP-HyFRC(S1.5,P0.25)  | 0.38      | 87.05                                | 15.98                       | 11.76                             | 44.82                       |
| HP-HyFRC(S1.5,P0.5)   | 0.38      | 89.25                                | 18.92                       | 11.95                             | 47.16                       |
| HP-HyFRC(S1.5,P1)     | 0.38      | 90.20                                | 20.18                       | 12.14                             | 49.50                       |
| HPFRC*-0              | 0.28      | 87.30                                | 0.00                        | 8.61                              | 0.00                        |
| HPFRC*-S0.5           | 0.28      | 91.13                                | 4.38                        | 10.21                             | 18.58                       |
| HPFRC*-S1             | 0.28      | 94.26                                | 7.97                        | 11.26                             | 30.78                       |
| HPFRC*-S1.5           | 0.28      | 98.7                                 | 13.06                       | 12.40                             | 44.66                       |
| HPFRC*-P0.25          | 0.28      | 88.59                                | 1.47                        | 9.06                              | 5.23                        |
| HPFRC*-P0.5           | 0.28      | 90.72                                | 3.91                        | 9.51                              | 10.45                       |
| HPFRC*-P1             | 0.28      | 92.1                                 | 5.4                         | 9.89                              | 14.87                       |
| HP-HyFRC*(S0.5,P0.25) | 0.28      | 91.15                                | 4.41                        | 10.68                             | 24.04                       |
| HP-HyFRC*(S0.5,P0.5)  | 0.28      | 92.20                                | 5.61                        | 11.02                             | 27.99                       |
| HP-HyFRC*(S0.5,P1)    | 0.28      | 94.70                                | 8.44                        | 11.48                             | 33.33                       |
| HP-HyFRC*(S1,P0.25)   | 0.28      | 95.20                                | 9.04                        | 11.87                             | 37.86                       |
| HP-HyFRC*(S1,P0.5)    | 0.28      | 98.80                                | 13.17                       | 12.43                             | 44.37                       |
| HP-HyFRC*(S1,P1)      | 0.28      | 99.75                                | 14.31                       | 12.89                             | 49.71                       |
| HP-HyFRC*(S1.5,P0.25) | 0.28      | 101.80                               | 16.32                       | 13.34                             | 54.94                       |
| HP-HyFRC*(S1.5,P0.5)  | 0.28      | 102.62                               | 17.54                       | 13.49                             | 56.68                       |
| HP-HyFRC*(S1.5,P1)    | 0.28      | 104.30                               | 19.47                       | 13.95                             | 61.44                       |

**Table 4:** 28-Day Compressive strengths ratios of HPSFRC/ HPPFRC and HPC, and percentage errors

| Mix Designation | Compressive strength, $f_{cf}$ (MPa) |          | $f_{cf} / f_c$ |          | Predicted Compressive strength, $f_{cf}$ by the model (MPa) |          | Predicted error (%) |          |
|-----------------|--------------------------------------|----------|----------------|----------|-------------------------------------------------------------|----------|---------------------|----------|
|                 | Cube                                 | Cylinder | Cube           | Cylinder | Cube                                                        | Cylinder | Cube                | Cylinder |
| HPFRC-0         | 75.05                                | 60.79    | 1.00           | 1.00     | 75.05                                                       | 60.79    | 0.00                | 0.00     |
| HPFRC-S0.5      | 78.85                                | 63.28    | 1.05           | 1.04     | 79.22                                                       | 64.16    | -0.44               | -1.40    |
| HPFRC-S1        | 82.5                                 | 67.24    | 1.10           | 1.11     | 83.38                                                       | 67.54    | -0.65               | -0.44    |
| HPFRC-S1.5      | 86.65                                | 73.14    | 1.15           | 1.20     | 87.55                                                       | 70.91    | -1.42               | 3.05     |
| HPFRC-P0.25     | 75.95                                | 61.76    | 1.01           | 1.02     | 76.01                                                       | 61.57    | -0.07               | 0.13     |
| HPFRC-P0.5      | 77.65                                | 62.9     | 1.03           | 1.03     | 76.96                                                       | 62.34    | 0.53                | 0.89     |
| HPFRC-P1        | 78.4                                 | 65.11    | 1.04           | 1.07     | 78.88                                                       | 63.89    | -0.60               | 1.87     |
| HPFRC*-0        | 87.3                                 | 70.71    | 1.00           | 1.00     | 87.30                                                       | 70.71    | 0.00                | 0.00     |
| HPFRC*-S0.5     | 90.13                                | 74.8     | 1.03           | 1.06     | 92.15                                                       | 74.63    | -1.32               | 0.22     |
| HPFRC*-S1       | 94.26                                | 76.42    | 1.08           | 1.08     | 96.99                                                       | 78.56    | -1.15               | -2.80    |
| HPFRC*-S1.5     | 98.7                                 | 80.44    | 1.13           | 1.14     | 99.84                                                       | 82.48    | -0.67               | -2.54    |
| HPFRC*-P0.25    | 88.59                                | 72.07    | 1.01           | 1.02     | 88.41                                                       | 71.61    | 0.20                | 0.64     |
| HPFRC*-P0.5     | 90.72                                | 73.25    | 1.04           | 1.04     | 89.53                                                       | 72.51    | 0.44                | 1.01     |
| HPFRC*-P1       | 92.1                                 | 75.52    | 1.05           | 1.07     | 91.75                                                       | 74.32    | 0.39                | 0.09     |

**Table 5:** 28-Day Flexural strength ratios of HPSFRC/HPPFRC and HPC, and percentage errors

| <b>Mix Designation</b> | <b>Flexural strength, <math>f_{rf}</math> (MPa)</b> | <b><math>f_{rf}/f_r</math></b> | <b>Predicted flexural strength, <math>f_{rf}</math> by the model (MPa)</b> | <b>Predicted error (%)</b> |
|------------------------|-----------------------------------------------------|--------------------------------|----------------------------------------------------------------------------|----------------------------|
| HPFRC-0                | 8.12                                                | 1.00                           | 8.12                                                                       | 0.00                       |
| HPFRC-S0.5             | 9.14                                                | 1.13                           | 9.15                                                                       | -0.09                      |
| HPFRC-S1               | 9.8                                                 | 1.21                           | 10.18                                                                      | -3.84                      |
| HPFRC-S1.5             | 10.85                                               | 1.34                           | 11.20                                                                      | -3.26                      |
| HPFRC-P0.25            | 8.54                                                | 1.05                           | 8.36                                                                       | 2.09                       |
| HPFRC-P0.5             | 8.64                                                | 1.06                           | 8.60                                                                       | 0.43                       |
| HPFRC-P1               | 8.87                                                | 1.10                           | 9.09                                                                       | -2.43                      |
| HPFRC*-0               | 8.61                                                | 1.00                           | 8.61                                                                       | 0.00                       |
| HPFRC*-S0.5            | 10.21                                               | 1.19                           | 9.70                                                                       | 4.99                       |
| HPFRC*-S1              | 11.26                                               | 1.31                           | 10.79                                                                      | 4.17                       |
| HPFRC*-S1.5            | 12.4                                                | 1.44                           | 11.88                                                                      | 4.19                       |
| HPFRC*-P0.25           | 9.06                                                | 1.05                           | 8.87                                                                       | 2.14                       |
| HPFRC*-P0.5            | 9.51                                                | 1.09                           | 9.12                                                                       | 4.08                       |
| HPFRC*-P1              | 9.89                                                | 1.15                           | 9.63                                                                       | 2.59                       |

**Table 6:** Elastic modulus of HPFRC and HP-HyFRC

| Mix Designation      | Peak stress<br>$f'_{cf}$<br>(MPa) | Elastic<br>modulus<br>$E_c$ (GPa) | Predicted<br>values by the<br>model (GPa) | Predicted<br>error<br>(%) |
|----------------------|-----------------------------------|-----------------------------------|-------------------------------------------|---------------------------|
| HPFRC-0              | 60.79                             | 33.72                             | 33.14                                     | 1.72                      |
| HPFRC-S0.5           | 63.28                             | 34.95                             | 34.37                                     | 1.65                      |
| HPFRC-S1             | 67.24                             | 35.76                             | 36.33                                     | -1.58                     |
| HPFRC-S1.5           | 73.14                             | 38.92                             | 39.22                                     | -0.76                     |
| HPFRC-P0.25          | 61.76                             | 34.06                             | 33.62                                     | 1.29                      |
| HPFRC-P0.5           | 62.9                              | 34.53                             | 34.19                                     | 1.00                      |
| HPFRC-P1             | 65.11                             | 35.12                             | 35.28                                     | -0.45                     |
| HP-HyFRC(S1,P0.5)    | 70.68                             | 36.91                             | 37.02                                     | -0.30                     |
| HP-HyFRC(S1,P1)      | 72.26                             | 38.06                             | 38.79                                     | -1.91                     |
| HP-HyFRC(S1.5,P0.5)  | 76.57                             | 41.24                             | 40.89                                     | 0.86                      |
| HP-HyFRC(S1.5,P1)    | 77.06                             | 41.69                             | 41.12                                     | 1.36                      |
| HPFRC*-0             | 70.71                             | 37.38                             | 38.03                                     | -1.73                     |
| HPFRC*-S0.5          | 74.8                              | 39.68                             | 40.02                                     | -0.87                     |
| HPFRC*-S1            | 76.42                             | 40.79                             | 40.81                                     | -0.06                     |
| HPFRC*-S1.5          | 80.44                             | 44.26                             | 42.76                                     | 3.38                      |
| HPFRC*-P0.25         | 72.07                             | 37.94                             | 37.69                                     | 0.66                      |
| HPFRC*-P0.5          | 73.25                             | 39.12                             | 39.27                                     | -0.38                     |
| HPFRC*-P1            | 75.52                             | 40.28                             | 40.38                                     | -0.24                     |
| HP-HyFRC*(S1,P0.5)   | 77.44                             | 42.03                             | 42.31                                     | -0.67                     |
| HP-HyFRC*(S1,P1)     | 78.47                             | 42.61                             | 41.95                                     | 1.55                      |
| HP-HyFRC*(S1.5,P0.5) | 81.04                             | 44.98                             | 44.03                                     | 2.11                      |
| HP-HyFRC*(S1.5,P1)   | 82.12                             | 45.21                             | 44.89                                     | 0.71                      |

**Table 7:** Ductility of HPFRC and HP-HyFRC

| <b>Mix Designation</b> | <b>Ductility in compression<br/>(Energy absorption)</b> | <b>Ductility ratio</b> |
|------------------------|---------------------------------------------------------|------------------------|
| HPFRC-0                | 0.14                                                    | 1                      |
| HPFRC-S0.5             | 0.25                                                    | 1.78                   |
| HPFRC-S1               | 0.36                                                    | 2.57                   |
| HPFRC- P0.5            | 0.17                                                    | 1.21                   |
| HPFRC-P1               | 0.21                                                    | 1.5                    |
| HP-HyFRC(S1,P0.5)      | 0.55                                                    | 3.93                   |

**Table 8:** 28-day Compressive strength of HPC (Silica fume/ Silica fume + Alccofine)

| <b>Mix Designation</b> | <b>w/b ratio</b> | <b>SF (%)</b> | <b>28-day Compressive strength, <math>f_{cf}</math> (MPa)</b> |                |                |                 |
|------------------------|------------------|---------------|---------------------------------------------------------------|----------------|----------------|-----------------|
|                        |                  |               | <b>AF = 0%</b>                                                | <b>AF = 5%</b> | <b>AF = 8%</b> | <b>AF = 10%</b> |
| HPFRC-0                | 0.38             | 20            | 75.05                                                         | 77.02          | 77.18          | 76.4            |
| HPFRC*-0               | 0.28             | 20            | 87.3                                                          | 89.25          | 90.21          | 88.63           |

**Table 9:** 28-day Flexural strength of HPC (Silica fume/ Silica fume + Alccofine)

| <b>Mix Designation</b> | <b>w/b ratio</b> | <b>SF (%)</b> | <b>28-day flexural strength, <math>f_{rf}</math> (MPa)</b> |                |                |                 |
|------------------------|------------------|---------------|------------------------------------------------------------|----------------|----------------|-----------------|
|                        |                  |               | <b>AF = 0%</b>                                             | <b>AF = 5%</b> | <b>AF = 8%</b> | <b>AF = 10%</b> |
| HPFRC-0                | 0.38             | 20            | 8.12                                                       | 8.28           | 8.57           | 8.19            |
| HPFRC*-0               | 0.28             | 20            | 8.61                                                       | 8.74           | 8.03           | 8.67            |

**Table 10:** 28-day compressive strength and predicted values of HP-HyFRC by MLRM and their corresponding absolute variations

| MIX Designation       | w/b  | 28-day compressive strength, MPa |           | Absolute error (%) |
|-----------------------|------|----------------------------------|-----------|--------------------|
|                       |      | Experimental                     | Predicted |                    |
| HPFRC-0               | 0.38 | 75.05                            | 74.89     | 0.21               |
| HPFRC-S0.5            | 0.38 | 78.85                            | 78.77     | 0.10               |
| HPFRC-S1              | 0.38 | 82.5                             | 82.66     | 0.19               |
| HPFRC-S1.5            | 0.38 | 86.65                            | 86.58     | 0.08               |
| HPFRC-P0.25           | 0.38 | 75.95                            | 76.03     | 0.1                |
| HPFRC-P0.5            | 0.38 | 77.65                            | 76.77     | 1.14               |
| HPFRC-P1              | 0.38 | 78.4                             | 78.64     | 0.31               |
| HP-HyFRC(S0.5,P0.25)  | 0.38 | 79.55                            | 79.91     | 0.45               |
| HP-HyFRC(S0.5,P0.5)   | 0.38 | 79.68                            | 80.65     | 1.22               |
| HP-HyFRC(S0.5,P1)     | 0.38 | 82.54                            | 82.53     | 0.02               |
| HP-HyFRC(S1,P0.25)    | 0.38 | 83.75                            | 83.79     | 0.05               |
| HP-HyFRC(S1,P0.5)     | 0.38 | 85.5                             | 84.53     | 1.13               |
| HP-HyFRC(S1,P1)       | 0.38 | 86.45                            | 86.41     | 0.05               |
| HP-HyFRC(S1.5,P0.25)  | 0.38 | 87.05                            | 87.72     | 0.77               |
| HP-HyFRC(S1.5,P0.5)   | 0.38 | 89.25                            | 88.46     | 0.89               |
| HP-HyFRC(S1.5,P1)     | 0.38 | 90.2                             | 90.33     | 0.15               |
| HPFRC*-0              | 0.28 | 87.3                             | 86.77     | 0.61               |
| HPFRC*-S0.5           | 0.28 | 91.13                            | 90.88     | 0.27               |
| HPFRC*-S1             | 0.28 | 94.26                            | 94.99     | 0.19               |
| HPFRC*-S1.5           | 0.28 | 98.7                             | 99.15     | 0.45               |
| HPFRC*-P0.25          | 0.28 | 88.59                            | 88.27     | 0.36               |
| HPFRC*-P0.5           | 0.28 | 90.72                            | 89.26     | 0.35               |
| HPFRC*-P1             | 0.28 | 92.1                             | 91.75     | 0.39               |
| HP-HyFRC*(S0.5,P0.25) | 0.28 | 91.15                            | 92.38     | 1.35               |
| HP-HyFRC*(S0.5,P0.5)  | 0.28 | 92.2                             | 93.37     | 1.27               |
| HP-HyFRC*(S0.5,P1)    | 0.28 | 94.7                             | 95.85     | 1.22               |
| HP-HyFRC*(S1,P0.25)   | 0.28 | 95.2                             | 96.49     | 1.36               |
| HP-HyFRC*(S1,P0.5)    | 0.28 | 98.8                             | 97.48     | 1.34               |
| HP-HyFRC*(S1,P1)      | 0.28 | 99.75                            | 99.96     | 0.21               |
| HP-HyFRC*(S1.5,P0.25) | 0.28 | 101.8                            | 100.65    | 1.13               |
| HP-HyFRC*(S1.5,P0.5)  | 0.28 | 102.62                           | 101.63    | 0.96               |
| HP-HyFRC*(S1.5,P1)    | 0.28 | 104.3                            | 104.12    | 0.17               |
