# Supplementary material for: Effect of Hybrid Fiber Reinforcements on the Mechanical and Ductility Performance of HPC Incorporating Micro Silica and Alccofine-1203 Prabath, N V N a , and Ramadoss, P b
Source: Research Square preprint supplement (doi:10.21203/rs.3.rs-1872706/v1), 2022-07-26
Supplement: Supplementary file 2 [file ccd0d60cb063ff6270b4ab91.pdf]

## NOTATION

$f_c$  = cube compressive strength of HPC, MPa

$f'_c$  = cylinder compressive strength of HPC, MPa

$f_r$  = flexural strength of HPC, MPa

$f_{cf}$  = compressive strength of HPFRC, MPa

$f_{rf}$  = flexural strength of HPFRC, MPa

$f_{spf}$  = split tensile strength of HPFRC, MPa

$V_f$  = fiber volume fraction in percent.

$E_c$  = modulus of elasticity

HPC = high performance concrete

HPFRC = high performance fiber reinforced concrete
